# Supplementary material for: Steady expression of high oleic acid in peanut bred by marker-assisted backcrossing for fatty acid desaturase mutant alleles and its effect on seed germination along with other seedling traits
Source: PLoS One. 2019 Dec 12;14(12):e0226252. doi: 10.1371/journal.pone.0226252 (PMC6910123; doi:10.1371/journal.pone.0226252)
Supplement: S1 Table — (XLSX) [file pone.0226252.s001.xlsx]

## Sheet: Sheet1
	Details of associated markers used for selecting ahFAD2A and ahFAD2B alleles in breeding populations
		Type of Marker	Gene	Markers	Sequence (5′ to 3′)	Wild allele	Mutant allele	Reference
		AS- PCR	ahFAD2A	F435-F	ATCCAAGGCTGCATTCTCAC	Null allele	203	Chen et al., 2010
				F435SUB-R	TGGGACAAACACTTCGTT
			ahFAD2B	F435-F	ATCCAAGGCTGCATTCTCAC	Null allele	195
				F435INS-R	AACACTTCGTCGCGGTCT
			Wild type	F435-F	ATCCAAGGCTGCATTCTCAC	Null allele	193
				F435WT-R	ACTTCGTCGCGGTCG
		CAPS	ahFAD2A	aF19-F	GATTACTGATTATTGACTT	598 and 228	826	Chu et al., 2007
				1056-R	CAACCCAAACCTTTCAGAG
			ahFAD2B	bF19-F	CAGAACCATTAGCTTTG	736, 263 and 171	550, 263, 213 and 171	Chu et al., 2009
				R1/FAD-R	CTCTGACTATGCATCAG
	Details of SSRs used for background selection of MABC line (Source: Gautami et al., 2012)
	Sr. No.	Primer Name	LGs	Position	Forward Primer Sequence (5'-3')	Reverse Primer Sequence (5'-3')	ICGV 06100	NRCGCS 587
	1	SEQ14A7	a01	0	GTACGCTTTTAATTTGCGGG	CTGGAAAGCCTTGAGAGCAT	+	+
	2	SEQ8E12	a01	56.32	TCTGTTGAGAACCACCAGCA	GTGCTAGTTGCTTGACGCAC	+	+
	3	SEQ13A10	a01	120.14	AACTCGCTTGTACCGGCTAA	AGGAATAATAACAATACCAACAGCA	+	+
	4	TC4E10	a01	171.01	ACGTCATCTTCCCTCCTCCT	CCATTTTCTCCTCGAACCAA	+	+
	5	SEQ2F5	a02	0	TGACCAAAGTGATGAAGGGA	AAGTTGTTTGTACATCTGTCATCG	+	+
	6	SEQ1B9	a02	34	CGTTCTTTGCCGTTGATTCT	AGCACGCTCGTTCTCTCATT	+	+
	7	SEQ14F4	a02	59.54	ACGTTTAGTTGCTTGCGTGA	TGAATTCAAAGGAAAATGAAAAA	+	+
	8	TC1E01	a02	86.94	CAGCAAAGAGTCGTCAGTCG	GAAAGTTCACTTGAGCAAATTCA	+	+
	9	GM2007	a03	19.4	GGGCCTCTATTTCCTTCCTTT	TTGGGATTCTTGGATCAGATG	+	+
	10	TC1E06	a03	92.28	ACCGTTACGAACGCTTTGTC	TCCCTCTCATACGACACCCT	+	+
	11	PM42	a03	185.02	ACGGGCCAAGTGAAGTGAT	TCTTGCTTCTTTGGTGATTAGC	+	+
	12	IPAHM103	a03	272.52	GCATTCACCACCATAGTCCA	TCCTCTGACTTTCCTCCATCA	+	+
	13	SEQ2C10	a04	7.68	GCAAGTCACATAGTTCAATTTTGG	GGCATAGCCATCCAAATCAT	+	+
	14	GM2589	a04	48.36	TTTCAGCTACCCTTCTTCCAAA	CAAAAGTGAACCCCGTAAGAA	+	+
	15	GM1311	a04	98.4	CACATGATGATGGATCTTTGTTC	AACCATGACACCAGCTACACC	+	+
	16	IPAHM395	a04	152.4	CAGAGTCAATGGCAGCGTAG	TCCTTCCCTCATCTAAAACCAA	+	+
	17	GM1878	a05	54.65	TCAGTGGTTCAGTGCATCAAG	GTCCCTTGGTCATCTTCGATT	+	+
	18	SEQ8C10	a05	131.92	ACGCCAACGACGTTAATACC	GTGCAATGGATGAGCTGAAA	+	+
	19	SEQ2F10	a05	170.37	GTGGTGGCGGTGTAATCTTT	AAACGCAAAACTCTCCCTCA	+	+
	20	SEQ18G1	a05	232.63	AATAGGTTGTGAAGCACGCA	TTCGGTGGTACTTTTAAGGCA	+	+
	21	IPAHM171	a06	0	TTGGTTGTTCGTAGCTCTGC	AGCACGGCAAACACTAACACT	+	+
	22	TC11A04	a06	112.06	ACTCTGCATGGATGGCTACAG	CATGTTCGGTTTCAAGTCTCAA	+	+
	23	PM35	a06	211.15	TGTGAAACCAAATCACTTTCATTC	TGGTGAAAAGAAAGGGGAAA	+	+
	24	PM210	a06	275.79	CCGCAGATCTTCTCCTGTGT	CCTCCTCATCCTCTAAACTCTGC	+	-
	25	GM1979	a07	0	TCCAAGAGGAAGAGGGAAAAC	AAAACCCTTACTTCAACAAAAGA	-	-
	26	S118	a07	64.5	TATATGATGCTTGATTGAGACT	CATGTAGAAGGCTTGGAGGGTAT	+	+
	27	SEQ3B8	a07	117.58	GGAGAAAGATCAAACGAGAACA	TTCGAATATCTGACATTTGCTTTT	+	+
	28	TC6G09	a07	178.34	GGAGGTTGCATGCATCATAGT	TCATTGAACGTATTTGAAAGCTC	-	-
	29	TC9B08	a08	0	GGTTGGGTTGAGAACAAGG	ACCCTCACCACTAACTCCATTA	+	+
	30	SEQ5D1	a08	88.42	TGGCCAAAACAACTGATTGA	TCCCAACTTTTCCGTTCTTG	+	+
	31	ML1G04	a08	95.78	GAAGGACTGAAGACTACTTT	ATCCAGTAGATTACGTTACA	-	-
	32	TC1B02	a08	179.53	AACATGCATGCAAATGGAAA	GCCAAAGTCACTTGTTTGCTT	+	+
	33	GM1878	a09	0	TCAGTGGTTCAGTGCATCAAG	GTCCCTTGGTCATCTTCGATT	+	+
	34	IPAHM75	a09	88.34	ATATGGCATGGGTGTTCATC	CCTAAAGCAGCATATTGCATAC	+	+
	35	GM2259	a09	188.32	GGAAGCACCGATAGTTCCTCT	TTCTGCTGCTTTCACTCATCA	+	+
	36	GM1609	a09	267.42	TGAATTCCATTTCCATCATCAA	CAACCAGCTCCTTCTCTACCC	+	+
	37	GM2531	a10	0	CAAGGATGTCCCAGATGATGT	GGACTCAATTTGTCGACCCTA	+	+
	38	TC7H11	a10	67.15	AGGTTGGAACTATGGCTGATTG	CCAGTTTAGCATGTGTGGTTCA	+	+
	39	GM699	a10	132.41	CATACCGACAGATTTTGAACTCG	GTTACTGTTGCTGCCACCATT	+	+
	40	GM799	a10	144.81	AAAAGCTATTCAAACGCACTTT	GCAGCAGAATGAGGAAGAAAA	-	-
	41	GM2724	b01	0	GGAAAAGAAGAGCAGCCACAT	CAACCAGCTCCTTCTCTACCC	+	+
	42	TC7D03	b01	127.51	CCCTTTATTCACTAAGAAACATGC	CAATTTTCGGCGATCAGAG	+	+
	43	TC2E05	b01	231.15	GAATTTATAAGGCGTGGCGA	CCATCCCTTCTTCCTTCACA	+	+
	44	GM1899	b01	300.44	GGCTCCGATTTCTACGTTTCT	CAACCAGCTCCTTCTCTACCC	+	+
	45	IPAHM569	b02	0	ATTGGTGGATATCGGACTCG	CCTATCCTTCAAGGCTTCTCG	+	+
	46	TC1E01	b02	56.9	CAGCAAAGAGTCGTCAGTCG	GAAAGTTCACTTGAGCAAATTCA	+	+
	47	SEQ18E07	b02	110.2	AACGTGCGTGGAAAGAGTTC	TGAGAGTGGTTTTTGTTGGTG	+	+
	48	SEQ4E08	b02	162.81	ACCATTGCACTTTGAAGCTCT	GCTTGGTTTGGGTTAGTTTGA	+	+
	49	TC2A02	b03	8.55	CTCCCTTGTGGGTATGTGGT	GGCTCCCATTCATTCTCAAA	+	+
	50	TC7E04	b03	74.7	GAAGGACCCCATCTATTCAAA	TCCGATTTCTCTCTCTCTCTCTC	+	+
	51	PM201	b03	190.13	CCTTTATAGAGGACCTTCCCTCTC	GCCTATTTGGTATCGGCTCA	+	+
	52	GM2009	b03	282.02	CAAACGCATACACCCCATAAC	TTTGGTTCTCGTTTGTGTTTT	-	-
	53	GM2584	b04	18.9	ACATTTTCAGCACCCTTCCTT	ACTCGTCAATGTTCCCTTGTG	+	+
	54	SEQ14D11	b04	50.63	ACGCTAGTCCCTTTGCTTTG	AAACAATCCTTTCTTTGGATGG	+	+
	55	AH408	b04	125.49	CATGGACATAGCAGCACAAACA	GAGGGTGGTGGCGTTTTAGA	+	+
	56	SEQ18C05	b04	177.66	TTTTGCAAATGAATACACAAAATTA	GCCATGGCCTCATCTAATC	+	+
	57	IPAHM352	b05	4.31	GGCGGGACACTTATCAGAGA	TTCCGTGTGACAGAAATACCC	+	+
	58	PM36	b05	59.2	ACTCGCCATAGCCAACAAAC	CATTCCCACAACTCCCACAT	+	+
	59	PM418	b05	113.03	TCTAATGAAAACCGACAAGTTTAGA	AGGCGTGCCAATAGAGTTTT	+	+
	60	IPAHM136	b05	167.28	CCCCTTTCTCCACTACTACCA	TTCTCCTAGGGACTCCGATG	+	+
	61	TC4D09	b06	3.95	TTGTGCTCTGCTCTTGGTTG	CTTGCTGGAGGAAACACACA	+	+
	62	IPAHM524	b06	41.49	GCCATGGATAAGAACCTGAAA	CAGTAAGCTGAGCTGGCAGA	+	+
	63	GM1991	b06	63.3	GAAAATGATGCCGAGAAATGT	GGGGAGAGATGCAGAAAGAGA	+	+
	64	IPAHM407	b06	99.03	TAACCAACACAAGCCCACAA	TCCATCATCACCCTCATCAA	+	+
	65	RN13D04	b07	0	CCGAGGTAGAATCGCAAGC	GTAATGCCAGGGAGAATCAGC	+	+
	66	GM1076	b07	40.57	AACAGACCAAAGGGTGTGTGA	TGCAGATTCTCACTTCCTAAGC	+	+
	67	SEQ3C02	b07	74.33	TCATCGCCGAGATTCTTTTC	CAAGGGAAATTGGTCAAGGA	+	+
	68	TC11F12	b07	114.37	TGAGTCTGTGGAAGAATAAGAGAAG	TGAGTCTATCGCCGCCTAC	+	+
	69	TC3G01	b08	0	GACGGTAATCGTGCCCTAAA	TGCAGTAGTGGCAGCAGAAC	+	+
	70	TC6H03	b08	47.96	TCACAATCAGAGCTCCAACAA	CAGGTTCACCAGGAACGAGT	+	+
	71	PM419	b08	96.46	TGCGAGACCAGAGAGGAGAT	TAGCGGTTCAGAAACCCTTT	+	+
	72	GM698	b08	144.34	CTCCTTAACAATAAATCGAGTGATGA	CAACCCATTTGCCACCTCTAT	-	-
	73	GM1483	b09	0	GCTGTTACATGGGCATCATTT	TCATCAGAGACCCAAGATCCA	+	+
	74	SEQ14H6	b09	41.79	GCAACTAGGGTGTATGCCGT	CAACCCTATACACCGAGGGA	+	+
	75	SEQ4G2	b09	78.82	TCAACTTTGGCTGCTTCCTT	TCAACCGTTTTTCACTTCCA	+	+
	76	GM2584	b09	125.86	ACATTTTCAGCACCCTTCCTT	ACTCGTCAATGTTCCCTTGTG	+	+
	77	SEQ7H6	b10	16.7	CATCCTCACGGGAGTCAGAT	ATACCTACGCGTTGTGGAGC	+	+
	78	TC7H11	b10	54.88	AGGTTGGAACTATGGCTGATTG	CCAGTTTAGCATGTGTGGTTCA	+	+
	79	IPAHM475	b10	121.43	GTGATTTCCTGGTTGGTGCT	AGCCTCAGCTGGTTTTGCT	+	+
	80	SEQ8D9	b10	166.99	TGAGTTTCCCCAAAAGGAGA	CAACAACAATACGGCCAACA	+	+
	Details of SSRs used for testing of recombinationin MABC line (Source: Pandey et al., 2014)
		Primer Name	Linkage group	Position (cM)	F	R	NRCGCS-587
	A genome	gi-1107	a09	3.5	GATACATCTCATCCGTTCGTG	CCGTCCGACCACATACAA	-
		PM-170	a09	13.9	GCCCAATGATGGACAGACA	TCAGACTTCTTGCACCATCC	+
		ahFAD2a	a09	22.9	Target locus
		AC3C07	a09	29	GGGGGTTTAGGAGCAAGATTT	CAAGGTGAGAACAAAGGCAAAG	+
		TC5D06	a09	37.7	GAAATTTTAGTTTTCAGCACAGCA	TTTTCCCCTCTTAAATTTTCTCG	+
		Seq4G02	a09	40.7	TCAACTTTGGCTGCTTCCTT	TCAACCGTTTTTCACTTCCA	+
	B genome	Seq7G02	b09	62.6	ACTCCCGATGCACTTGAAAT	AACCTCTGTGCACTGTCCCT	+
		GM2120	b09	73.1	TCCACTGCCACCTCTATCATC	TCCACCCACATAGACAGAAGC	+
		Seq4G02	b09	78.8	TCAACTTTGGCTGCTTCCTT	TCAACCGTTTTTCACTTCCA	+
		ahFAD2B	b09	82.8	Target locus
		GM1893	b09	90.1	ACCTTCACCTTCACCTGCAC	CTGCCTGCCCATAGATATCAG	+
		Seq17C09	b09	103.1	TTTGCTTTTGTTACTGACACCAA	TGGGGGACAAAAACGATACT	+
